# Supplementary material for: Fluorine-free superwetting systems: construction of environmentally friendly superhydrophilic, superhydrophobic, and slippery surfaces on various substrates
Source: Royal Society of Chemistry journal article supplement (doi:10.1039/c6py01596d), 2016-01-01
Supplement: c6py01596d1.pdf [file c6py01596d1.pdf]

## Supporting Information

# Fluorine-Free Superwetting Systems: Construction of Environmentally-Friendly Superhydrophilic, Superhydrophobic, and Slippery Surfaces on Various Substrates

Christoph Schlaich,<sup>a</sup> Leixiao Yu,<sup>a</sup> Luis Cuellar Camacho,<sup>a</sup> Qiang Wei<sup>\*ab</sup> and Rainer Haag<sup>\*ac</sup>

<sup>a</sup>Institut für Chemie und Biochemie, Freie Universität Berlin, Takustrasse 3, 14195, Berlin,  
Germany

<sup>b</sup>Department of Cellular Biophysics, Max-Planck Institute for Medical Research,  
Heisenbergstr. 3, 70569, Stuttgart, Germany

<sup>c</sup>Helmholtz Virtual Institute, Multifunctional Biomaterials for Medicine, Kantstraße 55, 14513,  
Teltow-Seehof, Germany

\*Address correspondence to haag@chemie.fu-berlin.de, wei@is.mpg.de

## 1. AFM results

For the surface roughness studies an AFM Nanoscope MultiMode 8 from Bruker operated in Contact and tapping mode was used. All measurements were performed in dry state and tapping mode was used when small regions were scanned (1-5 $\mu\text{m}$ ) while contact mode performed at best for larger areas (20-100 $\mu\text{m}$ ). AFM tips SNL-10 (Bruker) with a nominal tip radius of 2-12 nm were used. Scan rates of 0.5-0.15 Hz were used during mapping with 512 points per scan.

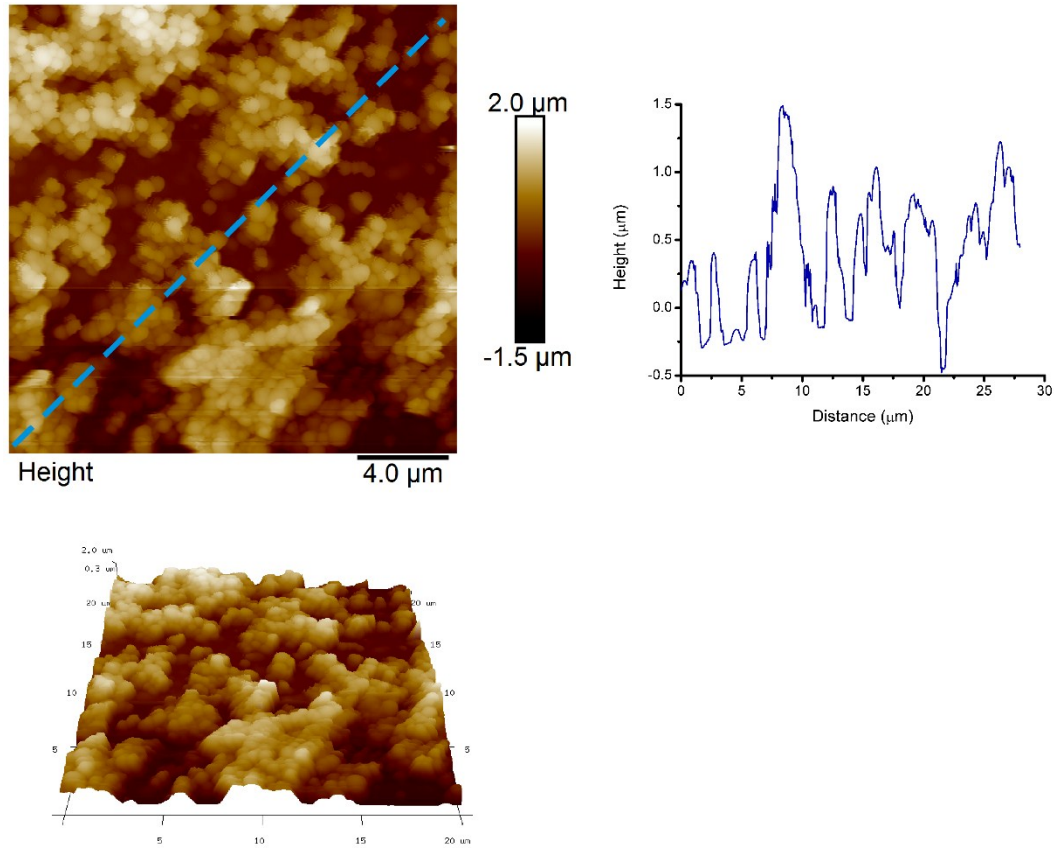

**Figure S1.** 20x20  $\mu\text{m}$  AFM images of the micro-roughened MI-dPG surfaces and corresponding cross section profile (dry condition). Roughness parameters:  $R_q = 489 \text{ nm}$ ,  $R_a = 411 \text{ nm}$ , and  $R_{\text{max}} = 2.71 \mu\text{m}$ .

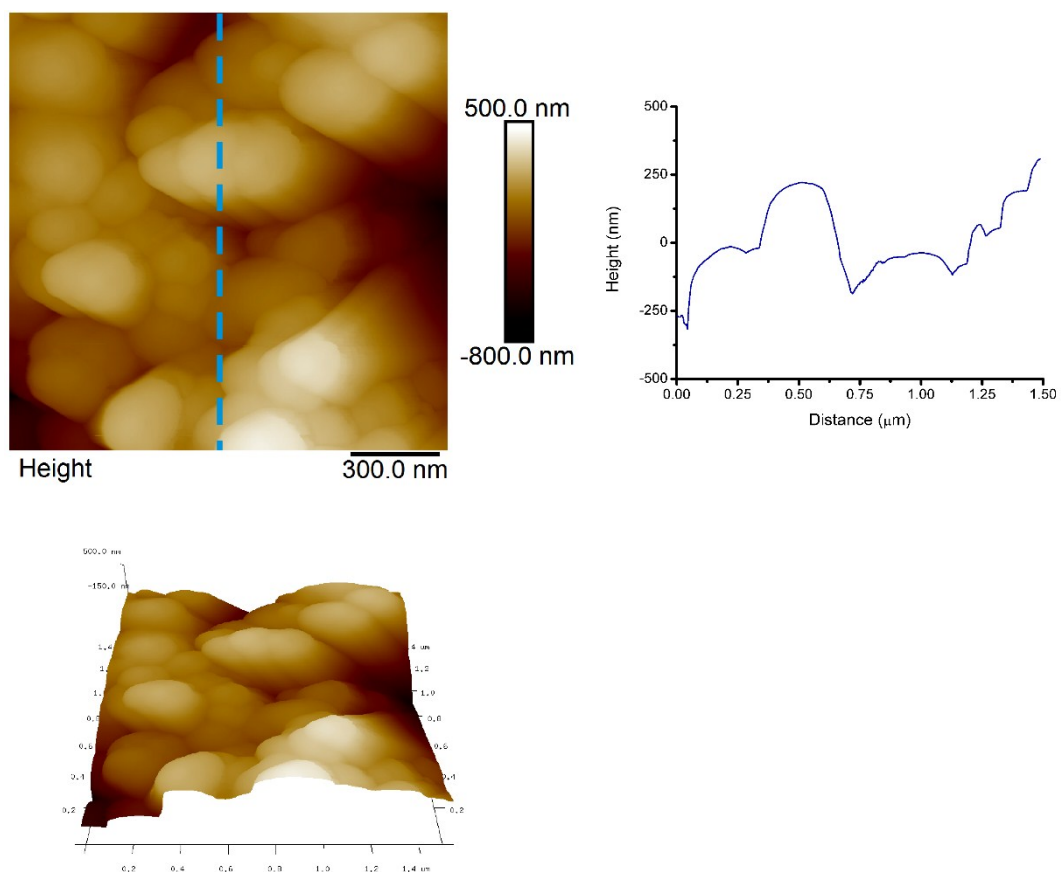

**Figure**

**Figure S2.** 1.5x1.5  $\mu\text{m}$  AFM images of the micro-roughened MI-dPG surfaces and corresponding cross section profile (dry condition). Roughness parameters:  $R_q = 159$  nm,  $R_a = 103$  nm, and  $R_{\text{max}} = 601$  nm.

## 2. SEM Pictures

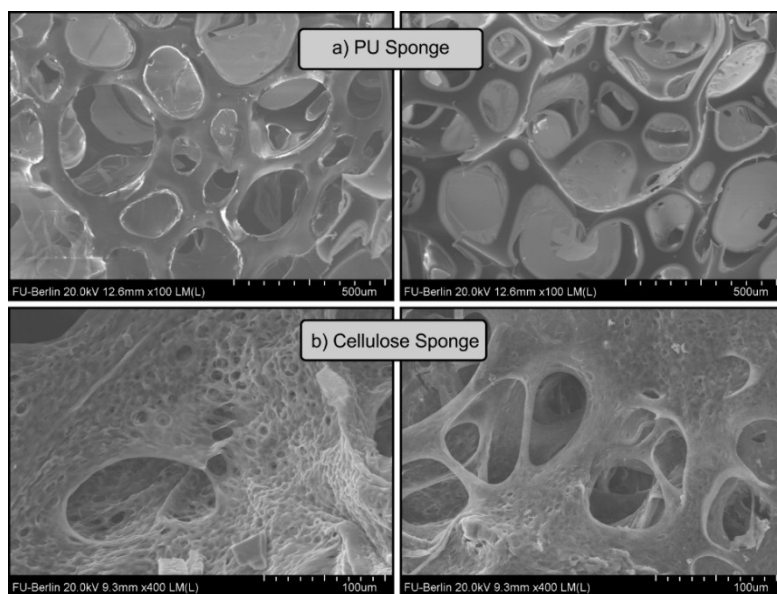

**Figure S3.** SEM images of (a) a PU sponge and (b) a cellulose sponge before (left) and after (right) coating with the SHP hMI-dPG layer.

## 3. pH stability test

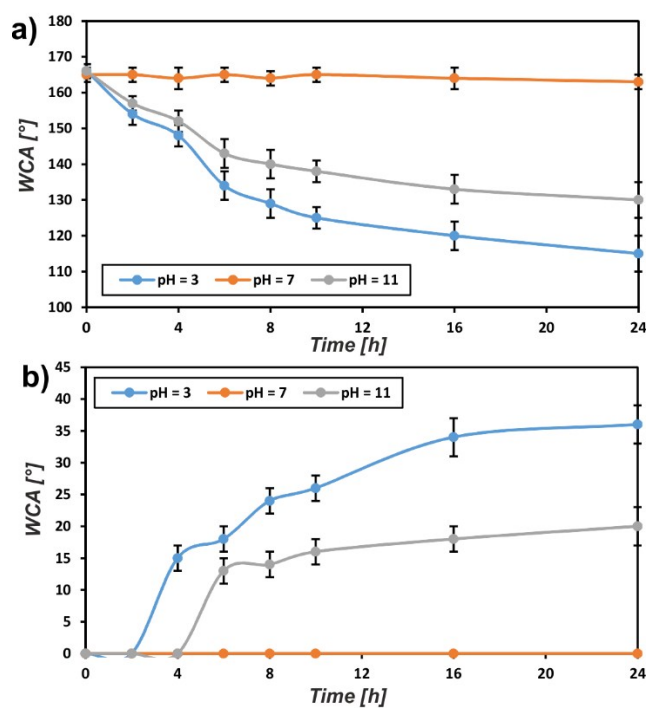

**Figure S4.** Water contact angle (WCA) and changes on the top of the (a) SHP hMI-dPG and (b) SHL hMI-dPG after different hours in acidic (pH = 3), neutral (pH = 7) and alkaline (pH = 11) water.

#### 4. Transparency of the eSLIPS

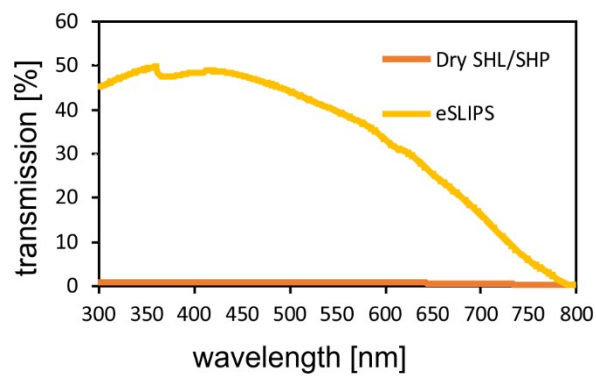

**Figure S5.** Optical transmission measurements for eSLIPS (yellow line) and superhydrophobic surface (orange line).
